# Supplementary material for: Extensive de novo mutation rate variation between individuals and across the genome of Chlamydomonas reinhardtii
Source: PubMed Central journal article supplement — Genome Res. 2015 Nov;25(11):1739–49. doi: 10.1101/gr.191494.115 (PMC4617969; doi:10.1101/gr.191494.115), 2015-11
Supplement: supp_gr.191494.115_Supplemental_Figure_S1.pdf [file supp_gr.191494.115_Supplemental_Figure_S1.pdf]

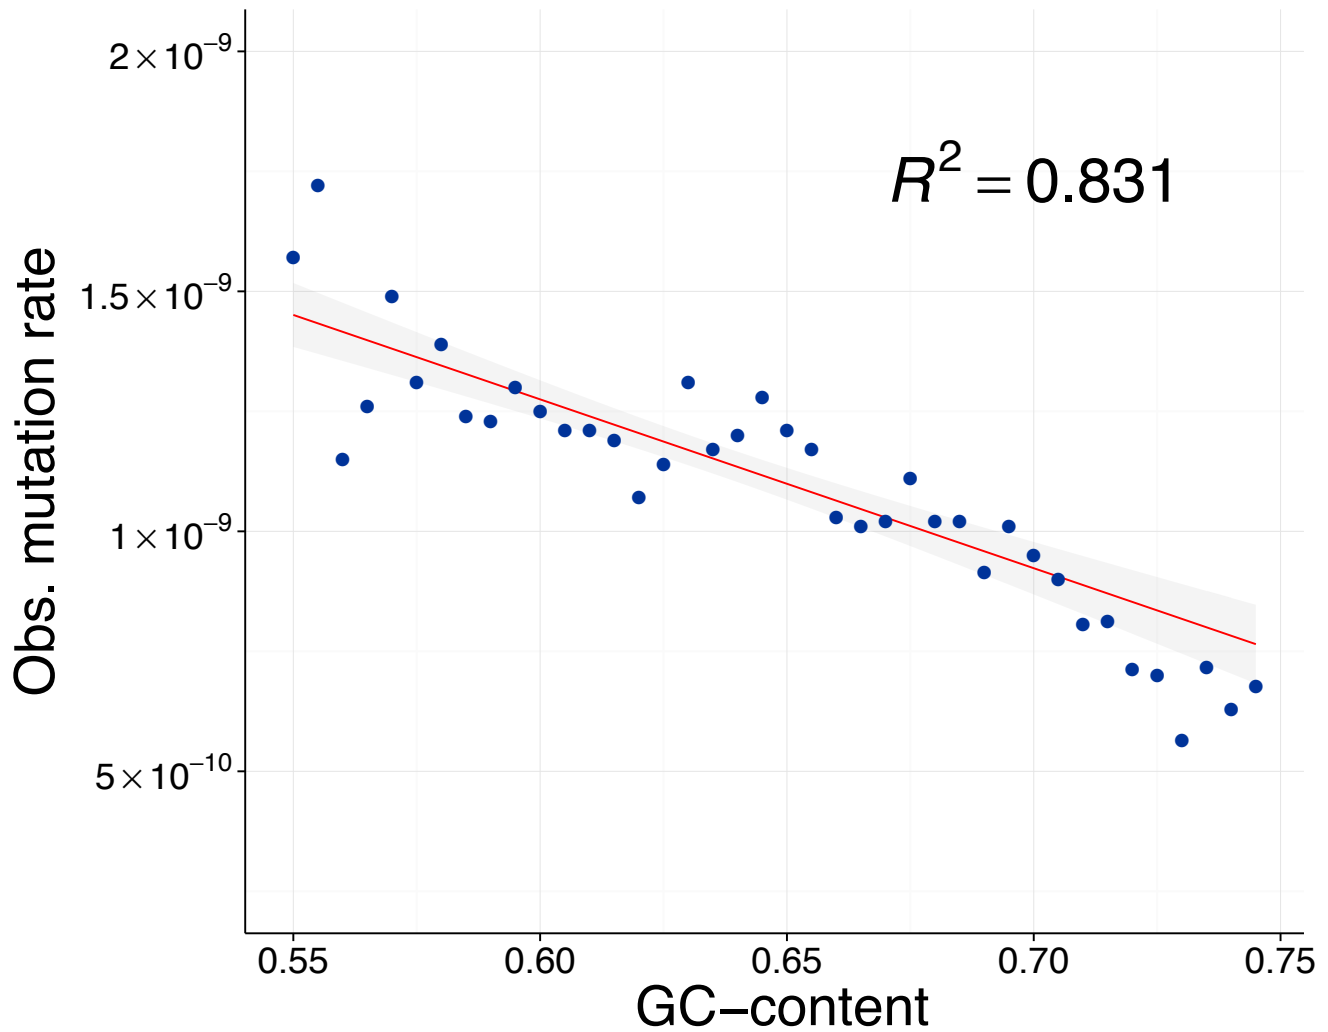

**Supplementary Figure S1. Relationship between mutation rate and GC content.**

Linear fit between observed mutation rate and GC content of the 1000bp surrounding a site. Each point represents multiple genomic sites placed in discrete bins (width = 0.005) based on each site's GC content. Observed mutation rate for each point was calculated as the number of observed mutations divided by the total number of callable sites-generations in that bin. The shaded grey area around the line represents the 95% confidence region.
