# Supplementary material for: Extensive de novo mutation rate variation between individuals and across the genome of Chlamydomonas reinhardtii
Source: HighWire-hosted journal article supplement (doi:10.1101/gr.191494.115), 2015-08-10
Supplement: Supplemental_Table_S2.docx [file Supplemental_Table_S2.docx]

**Supplementary Table S2.** This table indicates the genomic properties used as predictors in the logistic regression to model the mutability if sites in the genome. For each predictor the data type (Factor/Binary/Integer/Continuous) is indicated along with the unit of measurement where relevant. Some properties were estimated using publicly available data and 3rd party software. The source of the data and software name and version is reported below. All properties were calculated for the *Chlamydomonas reinhardtii* genome release version 5.3.

| **Property** | **Data** | **Unit** | **Software** | **Source** |
| --- | --- | --- | --- | --- |
| Chromosome | Factor | -n/a- | -n/a- | Reference Genome |
| Chromosome position | Integer | -n/a- | -n/a- | Reference Genome |
| 500bp upstream of CDS | Binary | 0/1 | -n/a- | Reference Genome |
| Natural variant | Binary | 0/1 | GATK UnifiedGenotyper v3.3 | Calculated from Genome-wide polymorphism of MA strains |
| Sequence context (2bp upstream + focal site) | Factor | 64 trinucleotide sequences | -n/a- | Reference Genome |
| Functional annotation | Factor | 3' UTR / 5' UTR / Protein coding / Intron / Intergenic | -n/a- | Reference Genome |
| Gene expression | Continuous | RNA-seq based gene expression (FPKM) | cufflinks v2.1.1 | EBI Accession: PRJEB1053; mean of Non-synchronized vegetative runs |
| Linkage disequilibrium | Continuous | population recombination *⍴*=Ner | LDHelmet v1.6 | Calculated from Genome-wide polymorphism |
| Recombination rate | Continuous | cM/bp | -n/a- | JGI. (personal communication) |
| Nucleosome occupancy | Continuous | FAIRE-seq peaks (read depth) | MACs | [47]  Accession ERP001835; http:// www.ebi.ac.uk/ena/data/view/ERP001835 |
| Distance to centromere | Integer | Base pairs | -n/a- | Reference Genome |
| GC content (windows of 101-106bp) | Continuous | %GC | -n/a- | Reference Genome |
| Gene density (windows of 104-106bp) | Continuous | Proportion of surrounding sites that are genic | -n/a- | Reference Genome |
| Repetitive sequence | Continuous | Entropy | Tandem Repeat Finder v4.07b | Reference Genome |
