# Supplementary material for: Extensive de novo mutation rate variation between individuals and across the genome of Chlamydomonas reinhardtii
Source: HighWire-hosted journal article supplement (doi:10.1101/gr.191494.115), 2015-08-10
Supplement: Supplemental_Table_S3.docx [file Supplemental_Table_S3.docx]

Supplementary Table 3 Annotation of mutations affecting DNA repair and replication proteins in mutator MA lines CC-2931 MA5 and CC-2344 MA1.

Each of the 6 mutations is reported relative to the coding strand, along with the amino-acid affected (when relevant) and the putative repair pathway and enzymatic function, which were taken from table 2 in Vlček et al. (2008).

| **MA line** | **Position** | **Mutation** | **Annotation** | **Amino Acid** | **Repair pathway1** | **Enzymatic function1** | **Gene ID2** |
| --- | --- | --- | --- | --- | --- | --- | --- |
| CC-2931 MA5 | chr 9:3020155 | G>A | Nonsyn | E>K | DNA polymerases and accessory factors | DNA polymerase zeta | Cre09.g387400 |
| chr 12:8190906 | C>T | Nonsyn | R>S | DNA polymerases and accessory factors | Deoxycytidyl transferase | Cre12.g550800 |
| chr 10:6556896 | G>C | Nonsyn | A>P | DNA repair and checkpoint pathways | DNA damage sensing protein kinase | Cre10.g467200 |
| chr 7:5553890 | A>C | Nonsyn | K>T | Nucleotide excision repair | Excinuclease ABC, C subunit | Cre07.g351500 |
| CC-2344 MA1 | chr 6:1230347 | C>T | Nonsyn | T>I | Nucleotide excision repair | DNA polI-like | Cre06.g257800 |
| chr 9:642309 | G>A | 5’ UTR | n/a | Nucleotide excision repair | Transcription factor *Tfb2* | Cre09.g403300 |

1Repair pathway and presumed enzymatic function were taken from Vlček et al. (2008).

2Gene ID is the Phytozome or JGI assigned gene ID for *C*. *reinhardtii* reference version 5.3
